# Supplementary material for: ETHE1 overexpression promotes SIRT1 and PGC1α mediated aerobic glycolysis, oxidative phosphorylation, mitochondrial biogenesis and colorectal cancer
Source: PubMed Central journal article supplement (PMC6592291; doi:10.18632/oncotarget.26958), 2019-06-18
Supplement: oncotarget-10-4004-s001.pdf [file oncotarget-10-4004-s001.pdf]

# ETHE1 overexpression promotes SIRT1 and PGC1 $\alpha$ mediated aerobic glycolysis, oxidative phosphorylation, mitochondrial biogenesis and colorectal cancer

## SUPPLEMENTARY MATERIALS

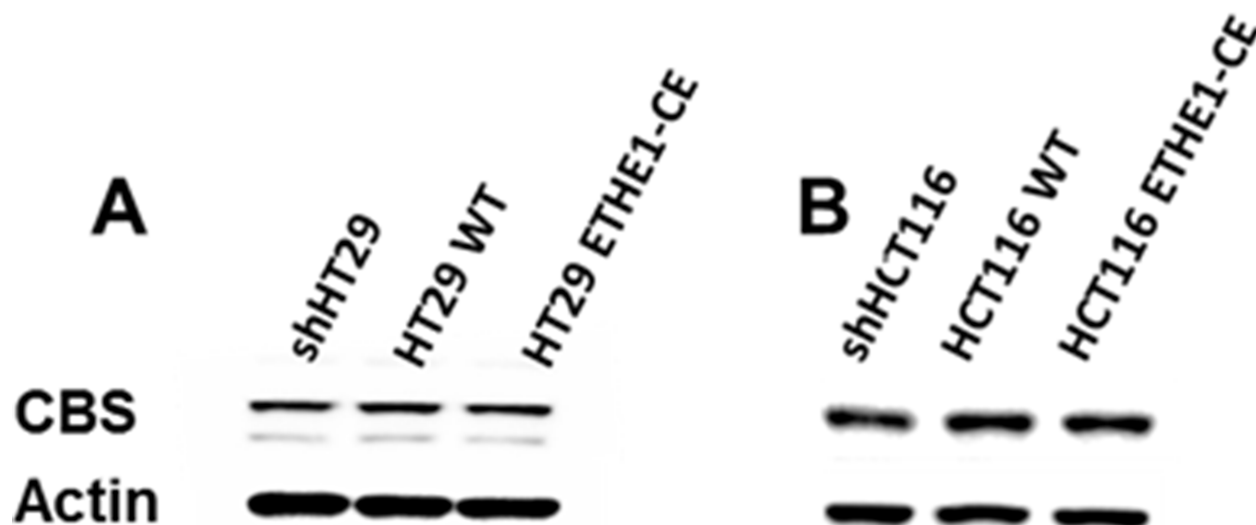

**Supplementary Figure 1:** CBS expression in (A) HT29 and (B) HCT116 shRNA knockdown, scrambled control(WT), ETHE1 constitutive expressing cells; Anti-CBS (1:10000 Abcam).

**Supplementary Table 1: FAP mitochondrial enrichment correlates with ETHE1 protein levels reanalysis of 214 differential expressed protein spots, comparing FAP to control group, show mitochondrion category is the most prominent up regulated component.** 66 Non-redundant proteins (each with  $p < 0.01$ ) were up-regulated more than 0.5 fold in FAP compared to control group. Mitochondria up regulation was prominent in FAP tissues, 30 proteins (row 8 in red, protein id are given),  $p = 1.62E-15$  for the identification of this category, and a FDR of the category of only  $2.04E-12$ .

See Supplementary File 1
